# Supplementary material for: Superbenzene-bridged bis(permethyl-β-cyclodextrin) as a convenient and effective probe for trinitrophenol exploder
Source: Royal Society of Chemistry journal article supplement (doi:10.1039/c6tc05121a), 2017-01-01
Supplement: c6tc05121a1.pdf [file c6tc05121a1.pdf]

## **Supporting Information**

### **Superbenzene-Bridged Bis(permethyl- $\beta$ -cyclodextrin) as Convenient and Effective Probe for Trinitrophenol Exploder**

Jie Yu, Yong Chen, Jing-Jing Li, Yu Liu\*

Department of Chemistry, State Key Laboratory of Elemento-Organic Chemistry, Nankai University, Collaborative Innovation Center of Chemical Science and Engineering, Tianjin 300071, P. R. China

\*Correspondance - [yuliu@nankai.edu.cn](mailto:yuliu@nankai.edu.cn)

## Experimental section

**Materials.** All chemicals were commercially available reagent grade unless noted.  $\beta$ -CD was recrystallized from water twice and dried in vacuo at 90°C for 24 h prior to use. Anhydrous  $\text{CH}_2\text{Cl}_2$  and dry DMF were dried over  $\text{CaH}_2$  for 24 h and then distilled prior to use. Column chromatography was performed on 200-300 mesh silica gel.

**Instruments.** NMR spectra were recorded on a Bruker AV400 instrument. UV/Vis spectra were recorded on a Shimadzu UV-3600 spectrophotometer in a quartz cell (light path 10 mm) at 25°C. Steady-state fluorescence emission spectra were recorded in a conventional quartz cell (10 × 10 × 45 mm) at 25 °C on a Varian Cary Eclipse equipped with a Varin Cary single-cell peltier accessory to control temperature. TEM images were acquired by a high-resolution transmission electron microscope (Philips Tecnai G2 20 S-TWIN microscope) operating at an accelerating voltage of 200 keV. The samples were prepared by placing a drop of solution onto a carbon-coated copper grid and air-dried. The SEM images were recorded on a JEOL JSM-7500F scanning electronic microscope operating at an accelerating voltage of 30 keV. The fluorescence lifetimes were measured by time-correlated single photon counting on a FLS920 instrument (Edinburg Instruments Ltd., Livingstone, UK) with a  $\text{H}_2$  pulse lamp.

## Synthesis and characterization.

### Synthetic routes of PHBC:

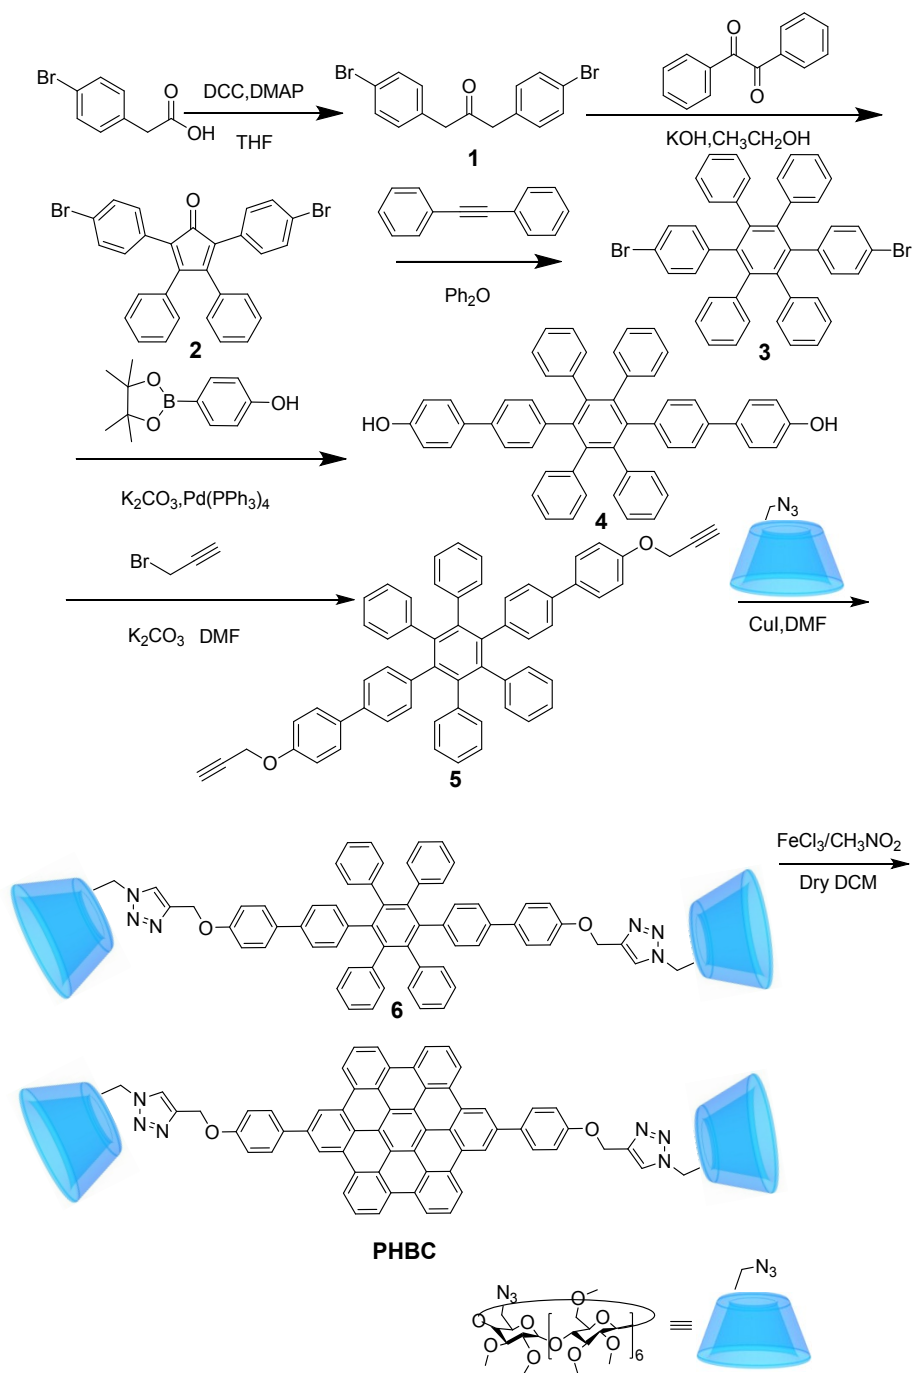

## Scheme 1. Synthetic routes of PHBC.

### 1.1 The synthesis of **1**<sup>1</sup>

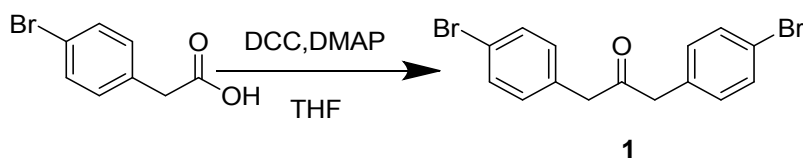

2-(4-Bromophenyl)acetic acid (8.00 g, 37.20 mmol) was added to a solution of **DCC** (8.06 g, 39.06 mmol) and **DMAP** (1.36 g, 11.16 mmol) in THF. The reaction mixture was stirred at room temperature for 3 h, then filtered and concentrated under vacuum. The residue was purified by chromatography to give **1** as a white solid (3.95 g, 58% yield). <sup>1</sup>H NMR (400 MHz, CDCl<sub>3</sub>) δ 7.44 (d, *J* = 8.1 Hz, 4H), 7.01 (d, *J* = 8.1 Hz, 4H), 3.68 (s, 4H); <sup>13</sup>C NMR (100 MHz, CDCl<sub>3</sub>) δ 204.31, 132.64, 131.87, 131.23, 121.28, 48.48.

### 1.2 The synthesis of **2**<sup>2</sup>

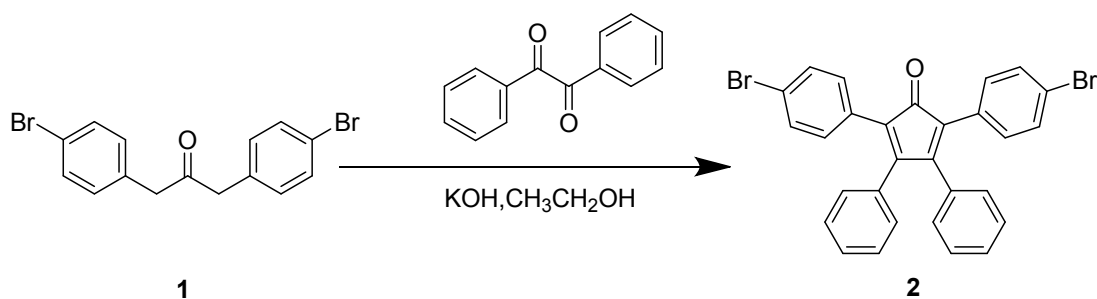

A solution of KOH (1.15 g, 20.55 mmol) in ethanol (50 mL) was added to a mixture of benzil (4.80 g, 22.83 mmol) and **1** (8.40 g, 22.83 mmol) in ethanol (100 mL). The reaction mixture was refluxed for 1 h and then cooled to 0 °C. The precipitate was collected by filtration to give **2** (10.20 g, 82%) as a brown solid. <sup>1</sup>H NMR (400 MHz, CDCl<sub>3</sub>) δ 7.37 (d, *J* = 8.5 Hz, 4H), 7.28 (d, *J* = 7.4 Hz, 2H), 7.19 (t, *J* = 7.5 Hz, 4H), 7.09 (d, *J* = 8.5 Hz, 4H),

6.90 (d,  $J = 7.2$  Hz, 4H);  $^{13}\text{C}$  NMR (100 MHz,  $\text{CDCl}_3$ )  $\delta$  199.54, 155.00, 132.56, 131.64, 131.35, 129.49, 129.17, 128.90, 128.23, 124.37, 122.00.

### 1.3 The synthesis of **3**

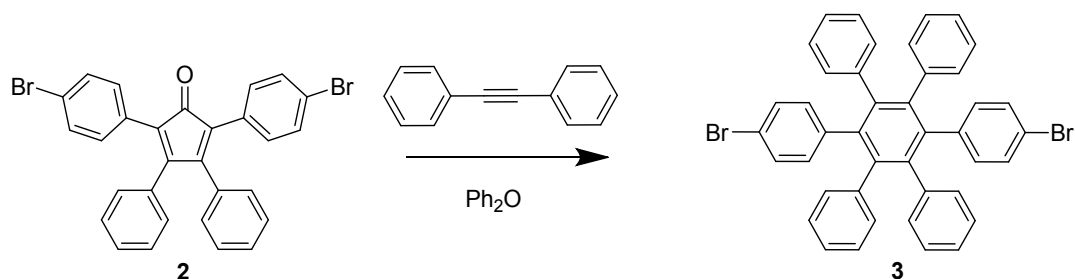

1,2-Diphenylethyne (0.493 g, 2.77 mmol) and **2** (1.50 g, 2.77 mmol) was suspended in diphenylether. The reaction mixture was refluxed under  $\text{N}_2$  for 24 h, then cooled to room temperature. The solvent was removed under vacuum, and the resulting residue was purified by chromatography to give compound **3** (1.68 g, 88%) as a white solid.  $^1\text{H}$  NMR (400 MHz,  $\text{CDCl}_3$ )  $\delta$  6.98 (d,  $J = 8.4$  Hz, 4H), 6.88 – 6.87 (m, 12H), 6.80 – 6.78 (m, 8H), 6.68 (d,  $J = 8.4$  Hz, 4H);  $^{13}\text{C}$  NMR (100 MHz,  $\text{CDCl}_3$ )  $\delta$  199.54, 155.00, 132.56, 131.64, 131.35, 129.49, 129.17, 128.90, 128.23, 124.37, 122.00.

### 1.4 The synthesis of **4**

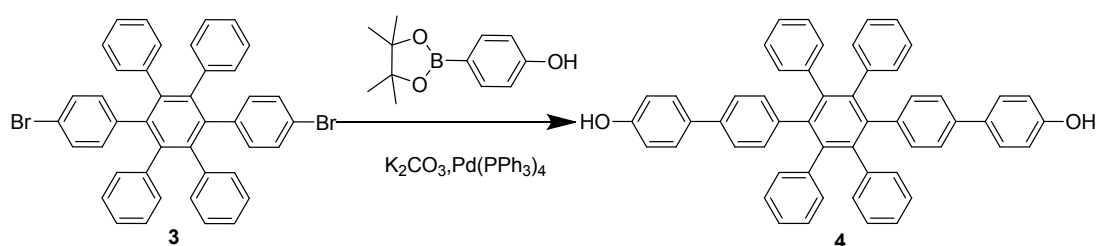

$\text{Pd}(\text{PPh}_3)_4$  (0.83 g, 5% mol) and  $\text{K}_2\text{CO}_3$  (2.00 g, 14.44 mmol) was added to a mixture of 4-(4,4,5,5-tetramethyl-1,3,2-dioxaborolan-2-yl)phenol (3.18 g, 14.44 mmol) and **3** (4.00 g,

5.78 mmol) in THF under N<sub>2</sub>, and the reaction mixture was refluxed for 72 h. After the mixture was cooled to room temperature, acidified with diluted HCl, and then concentrated, the residue was washed with H<sub>2</sub>O and dried under vacuum. The crude product **4** was used for next step directly without further purification.

### 1.5 The synthesis of **5**

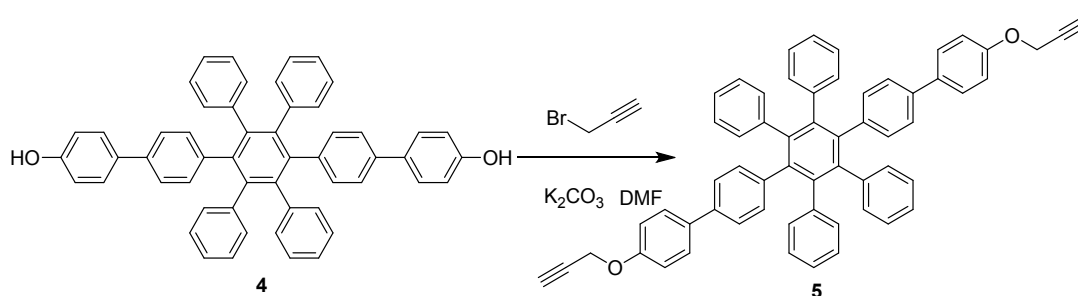

K<sub>2</sub>CO<sub>3</sub> (0.31 g, 2.23mmol) was added to a solution of **4** (0.40 g, 0.56 mmol) in anhydrous DMF, which was stirred under N<sub>2</sub> for 30 min, and then propargyl bromide (0.33 g, 2.23mmol, 80 wt% solution in toluene) was added. The reaction mixture was heated at 50 °C for 48 h, cooled and poured into the ice water, then extracted with DCM. The organic layer was washed with H<sub>2</sub>O, saturated NaCl solution, dried with anhydrous Na<sub>2</sub>SO<sub>4</sub>, filtrated and concentrated. The residue was purified by chromatography to give **5** (0.24 g, 54%) as a white solid. <sup>1</sup>H NMR (400 MHz, CDCl<sub>3</sub>) δ 7.39 (d, *J* = 8.8 Hz, 4H), 7.08 (d, *J* = 8.3 Hz, 4H), 6.95 (d, *J* = 8.8 Hz, 4H), 6.86 – 6.84 (m, 24H), 4.69 (d, *J* = 2.4 Hz, 4H), 2.50 (t, *J* = 2.3 Hz, 2H); <sup>13</sup>C NMR (100 MHz, CDCl<sub>3</sub>) δ 156.75, 140.63, 140.46, 140.04, 139.31, 136.77, 134.29, 131.84, 131.47, 127.72, 126.68, 125.24, 124.72, 115.04, 78.55, 75.54, 55.86. MS (MALDI-TOF): *m/z* calcd for (C<sub>60</sub>H<sub>42</sub>O<sub>2</sub>):794.32, found: 794.30.

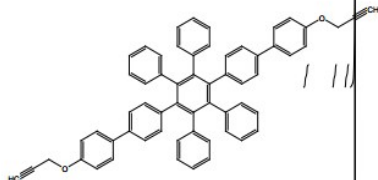

**Figure S1.**  $^1\text{H}$  NMR (400 MHz) spectrum of **5** in  $\text{CDCl}_3$  at 25  $^\circ\text{C}$ .

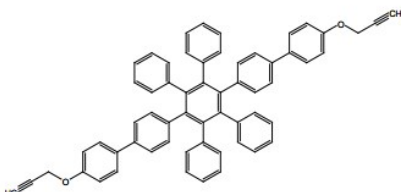

**Figure S2.**  $^{13}\text{C}$  NMR (100 MHz) spectrum of **5** in  $\text{CDCl}_3$  at 25  $^\circ\text{C}$ .

## 1.6 The synthesis of 6

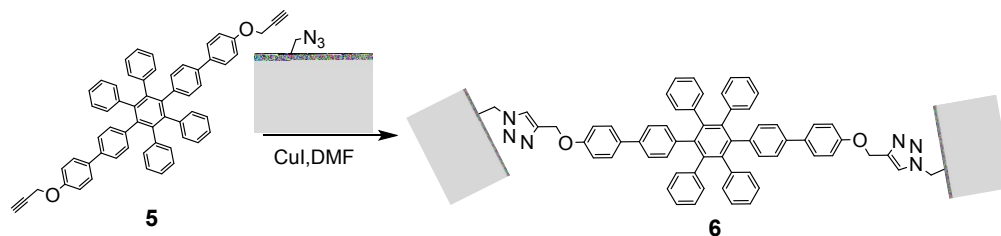

CuI (47.6 mg, 0.25 mmol) was added to a solution of **5** (0.20 g, 0.25 mmol) and 6-deoxy-6-azido-permethyl- $\beta$ -CD (0.91 g, 0.63 mmol) in dry DMF, and the reaction mixture was stirred at 60°C for 48 h. The solution was cooled to room temperature and filtrated. H<sub>2</sub>O was added to the filtrate and then extracted with DCM. The organic layer was separated and then washed with H<sub>2</sub>O, saturated NaCl solution, dried with anhydrous Na<sub>2</sub>SO<sub>4</sub>, filtrated and concentrated. The residue was purified by chromatography to give **6** (0.72 g, 78%) as a white solid. <sup>1</sup>H NMR (400 MHz, CDCl<sub>3</sub>)  $\delta$  7.71 (s, 2H), 7.36 (d,  $J$  = 8.6 Hz, 4H), 7.05 (d,  $J$  = 8.1 Hz, 4H), 6.96 – 6.78 (m, 28H), 5.25 (d,  $J$  = 3.5 Hz, 2H), 5.15 (m, 14H), 5.00 (d,  $J$  = 12.7 Hz, 2H), 4.71 – 4.65 (m, 2H), 4.18 – 2.86 (m, 202H); <sup>13</sup>C NMR (100 MHz, CDCl<sub>3</sub>)  $\delta$  157.48, 143.52, 140.60, 140.45, 139.97, 139.30, 136.72, 133.97, 131.84, 131.44, 127.76, 126.66, 125.22, 124.95, 124.63, 114.74, 99.26, 98.90, 98.80, 98.27, 83.00, 82.08, 81.96, 81.90, 81.78, 81.11, 80.25, 79.93, 79.35, 71.51, 71.26, 70.95, 70.75, 70.37, 62.06, 61.74, 61.48, 61.40, 61.32, 59.15, 59.11, 59.05, 59.01, 58.96, 58.84, 58.74, 58.68, 58.57, 58.42, 51.46; HR-MS (MALDI-TOF):  $m/z$  calcd for (C<sub>184</sub>H<sub>260</sub>N<sub>6</sub>O<sub>70</sub>+Na<sup>+</sup>):3698.6933, found: 3698.6883.



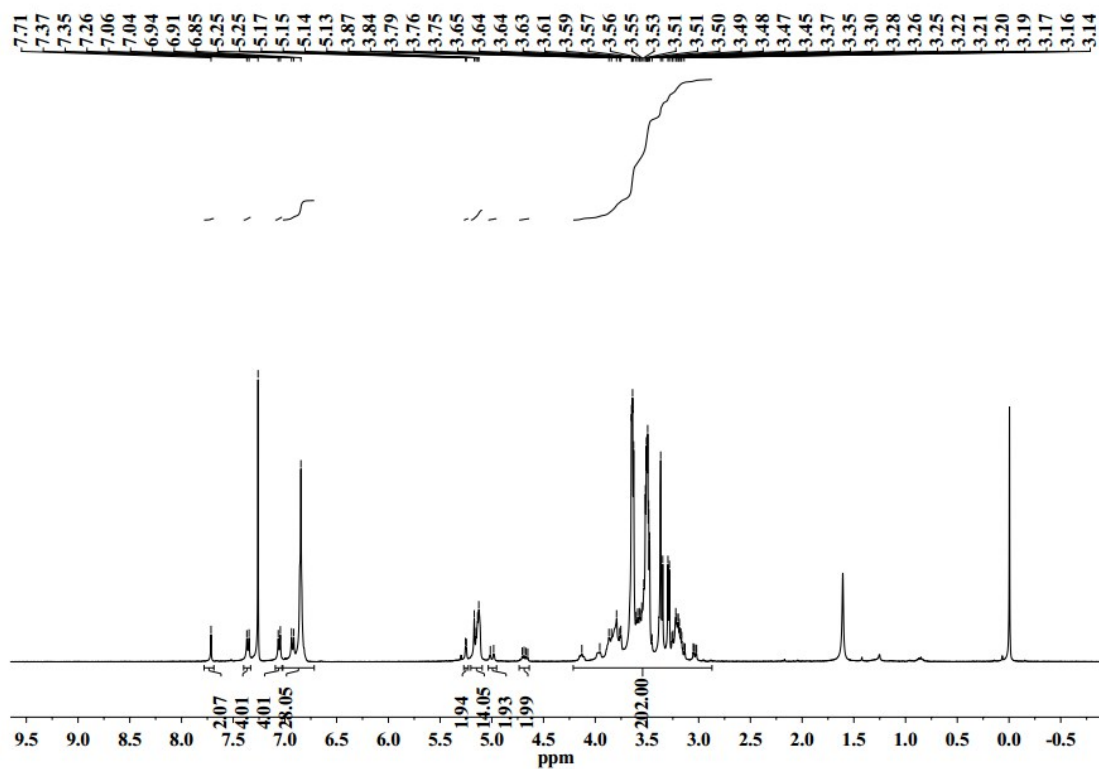

**Figure S3.** <sup>1</sup>H NMR (400 MHz) spectrum of **6** in CDCl<sub>3</sub> at 25 °C.

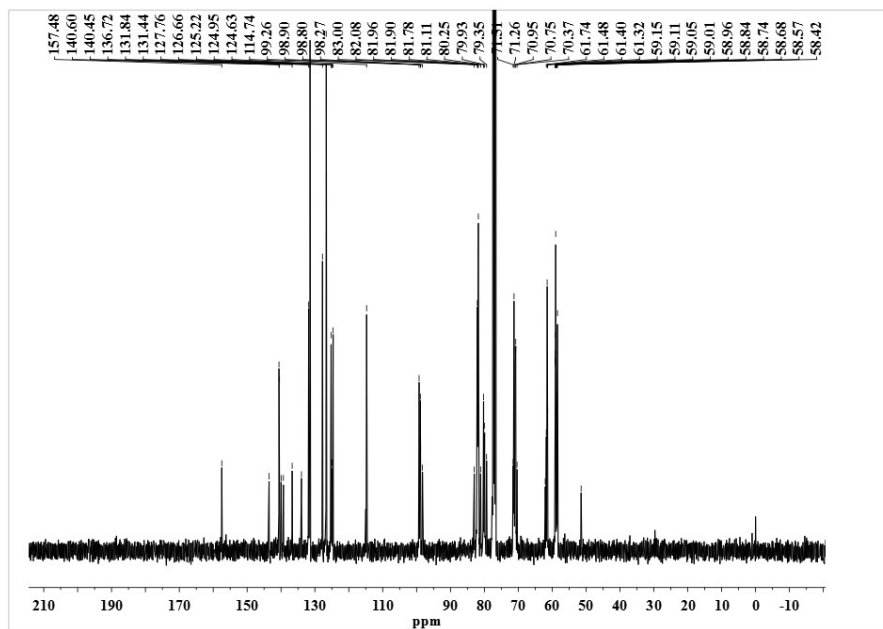

**Figure S4.** <sup>13</sup>C NMR (100 MHz) spectrum of **6** in CDCl<sub>3</sub> at 25 °C.

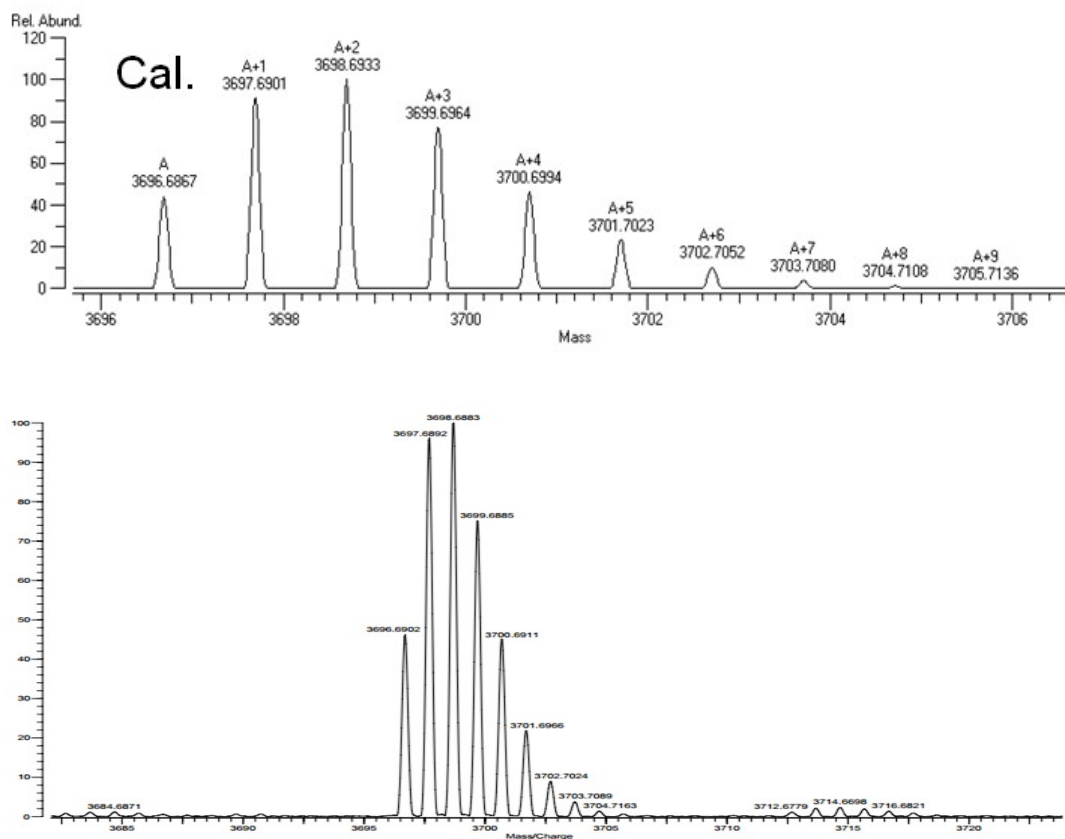

**Figure S5.** MALDI-MS spectrum of **6**.

## 1.7 The synthesis of PHBC<sup>4</sup>

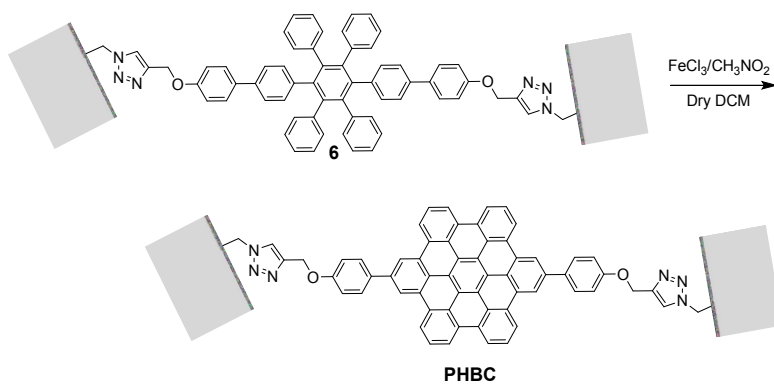

Anhydrous  $\text{FeCl}_3$  (0.64 g, 3.92mmol) in  $\text{MeNO}_2$  (10 mL) was added to a solution of **6** (400

mg, 0.11 mmol) in dry DCM (200 mL) with argon bubbling through a glass tube. The reaction mixture was stirred for 3 h with continuous argon bubbling, then the cooled MeOH (50 mL) was added to the reaction mixture to quench the reaction. The organic layer was washed with H<sub>2</sub>O, saturated NaCl solution, dried with anhydrous Na<sub>2</sub>SO<sub>4</sub>, then filtrated and evaporated to dryness. The residue was purified by chromatography to give **PHBC** (0.25g, 63%) as a yellow solid. <sup>1</sup>H NMR (400 MHz, CDCl<sub>3</sub>) δ 8.52 – 8.25 (m, 12H), 7.94 – 7.89 (m, 6H), 7.52 (br, 4H), 7.36 (br, 4H), 5.47 – 5.41 (m, 4H), 5.26–4.95 (m, 16H), 4.13 – 3.13 (m, 202H); <sup>13</sup>C NMR (100 MHz, CDCl<sub>3</sub>) δ 158.03, 143.59, 136.51, 134.83, 129.28, 128.77, 125.42, 123.59, 122.51, 120.60, 118.89, 115.22, 99.27, 98.89, 98.77, 98.38, 82.69, 82.21, 82.07, 82.02, 81.83, 81.61, 81.26, 80.36, 79.91, 79.80, 79.10, 71.61, 71.39, 70.98, 70.82, 70.75, 70.37, 62.27, 61.84, 61.48, 61.45, 61.39, 61.34, 59.35, 59.19, 59.04, 58.70, 58.65, 58.48, 58.43, 58.37, 51.38; HR-MS (MALDI-TOF): *m/z* calcd for ( C<sub>184</sub>H<sub>248</sub>N<sub>6</sub>O<sub>70</sub><sup>+</sup> Na<sup>+</sup>):3686.5994, found: 3686.5949.

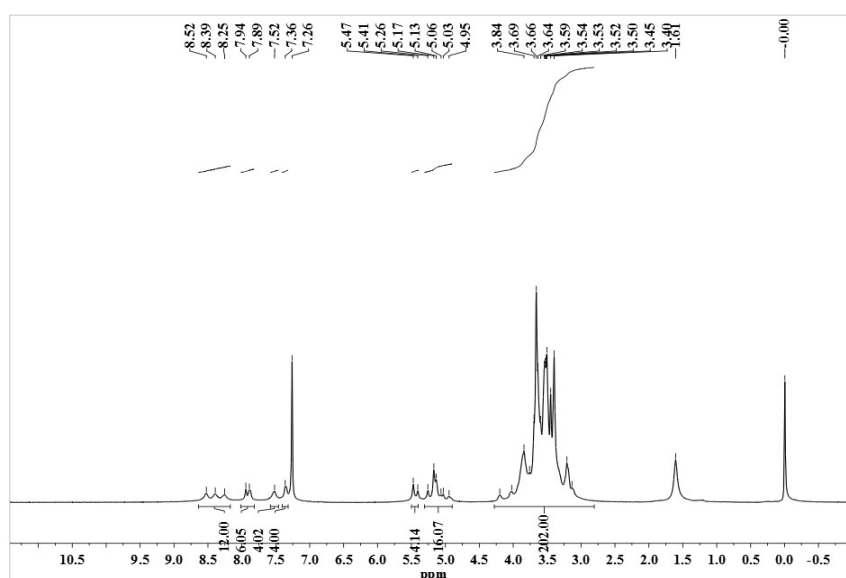

**Figure S6.** <sup>1</sup>H NMR (400 MHz) spectrum of **PHBC** in CDCl<sub>3</sub> at 25 °C.

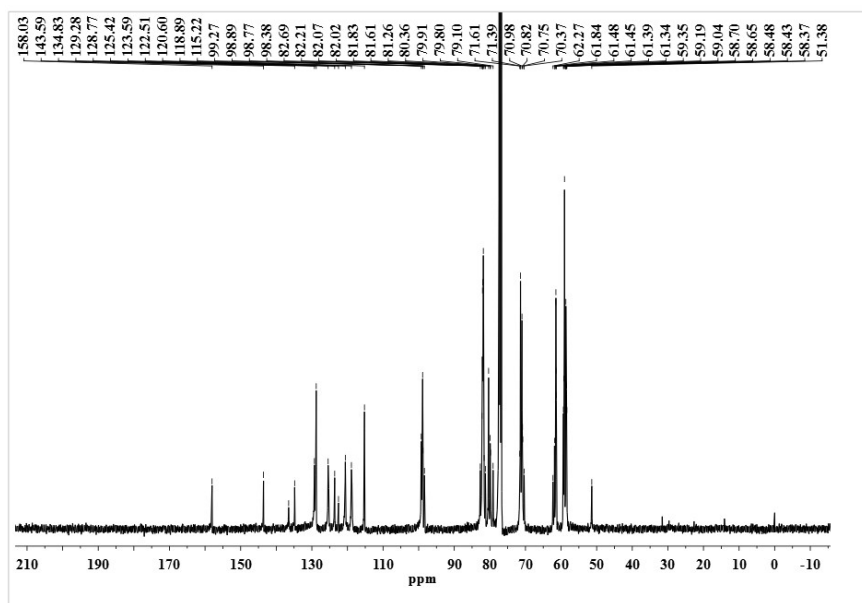

**Figure S7.**  $^{13}\text{C}$  NMR (100 MHz) spectrum of **PHBC** in  $\text{CDCl}_3$  at 25 °C.

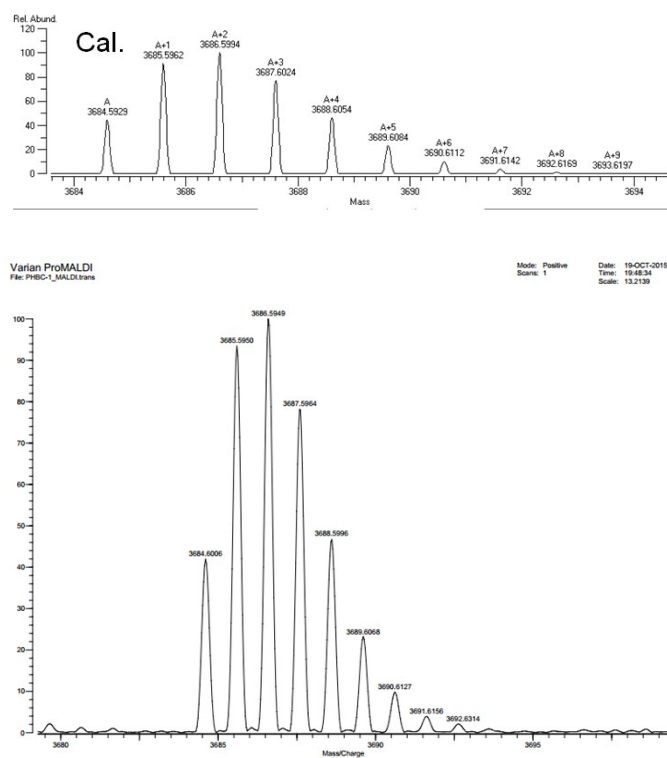

**Figure S8.** MALDI-MS spectrum of **PHBC**.

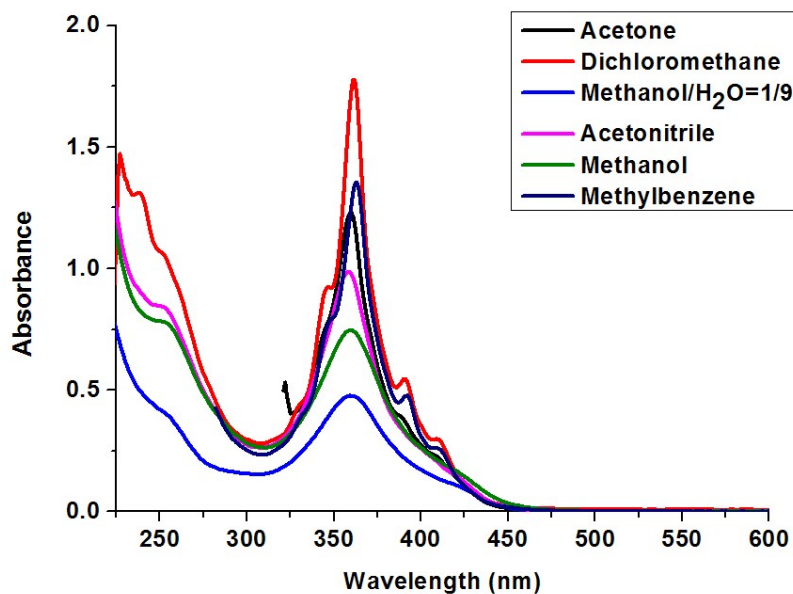

**Figure S9.** UV-vis spectra of **PHBC** ( $1.0 \times 10^{-5}$  M) in different solvents at 25°C.

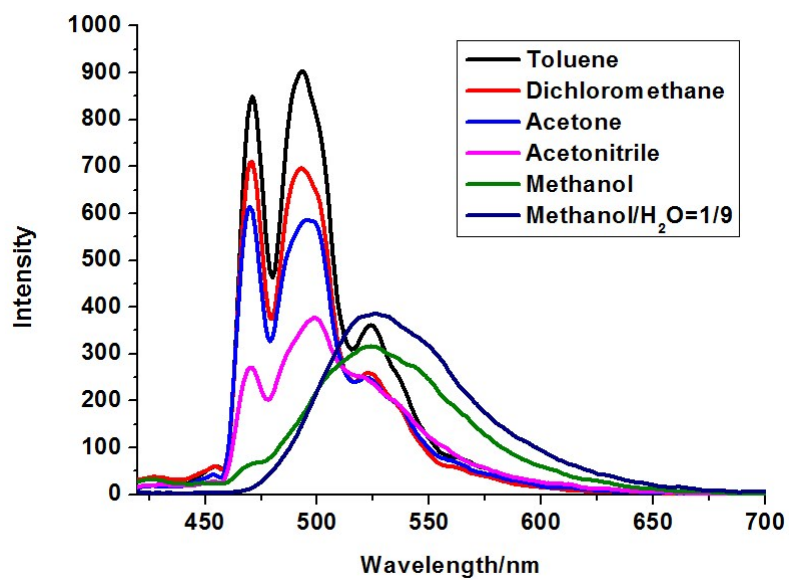

**Figure S10.** Emission spectra of **PHBC** ( $1.0 \times 10^{-6}$  M,  $\lambda_{\text{ex}}=365$  nm) in different solvents.

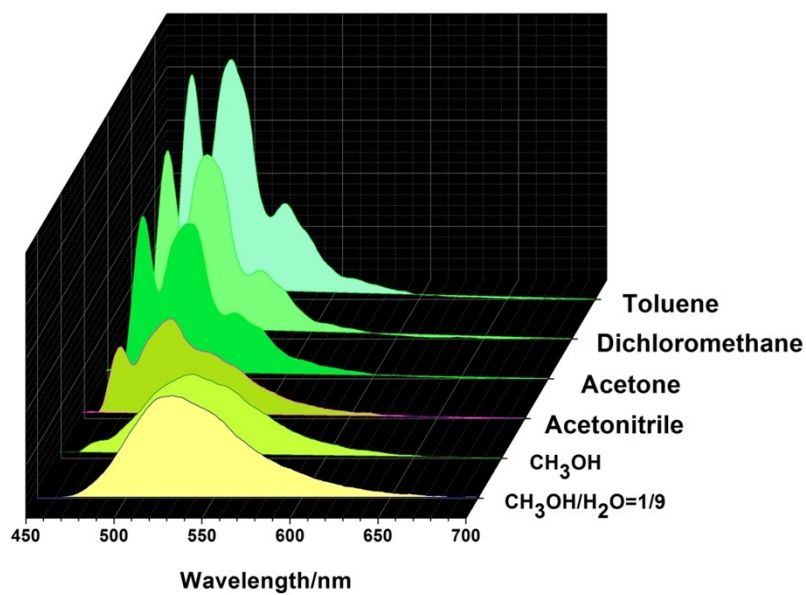

**Figure S11.** Emission spectra of **PHBC** ( $1.0 \times 10^{-6}$  M,  $\lambda_{\text{ex}}=365$  nm) in different solvents.

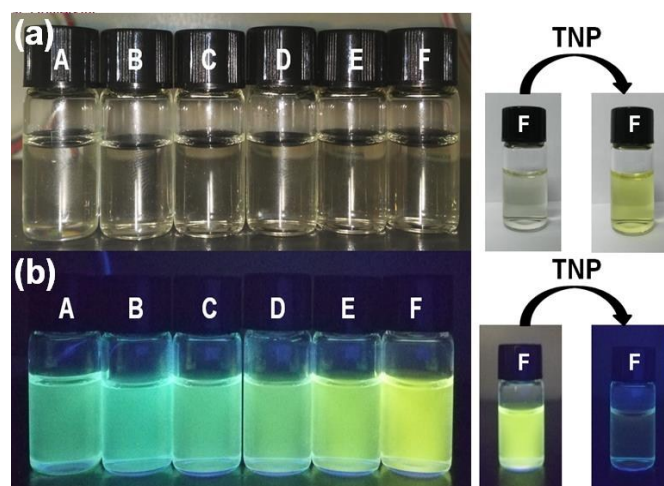

**Figure S12.** The color of **PHBC** in different solvents under (a)visible light and (b)UV light(365 nm): A) toluene, B) dichloromethane, C) acetone, D) acetonitrile, E) methanol, F) methanol/ $\text{H}_2\text{O}=1/9$ .

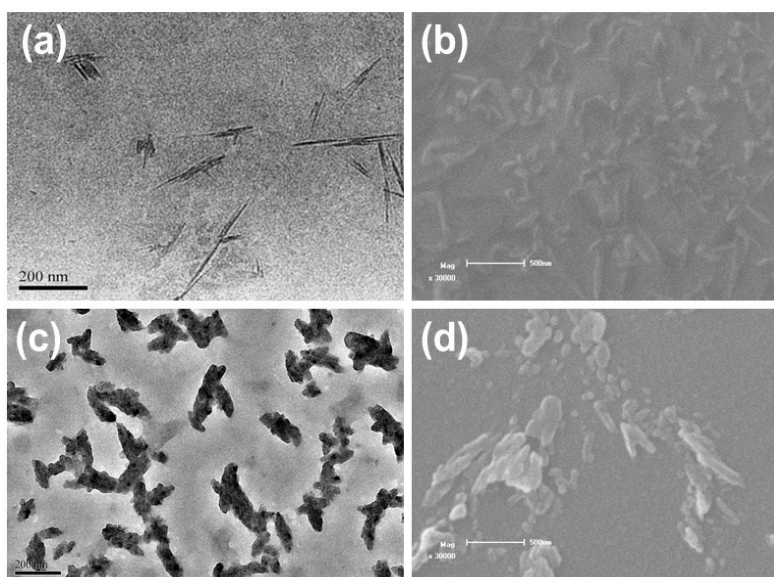

**Figure S13.** TEM (a,c) and SEM (b,d) images of **PHBC** in  $\text{CH}_3\text{OH}$  (a,b) and  $\text{CH}_3\text{OH}:\text{H}_2\text{O}$  =1:9 (c,d).

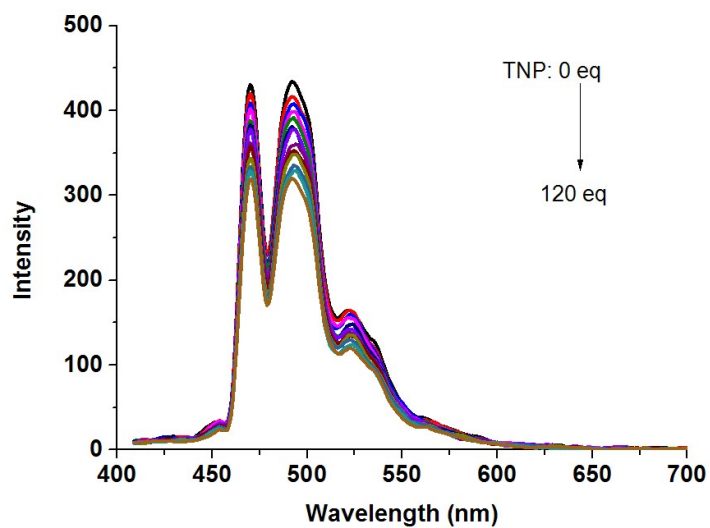

**Figure S14.** Emission spectra of **PHBC** ( $1.0 \times 10^{-6}$  M in DCM,  $\lambda_{\text{ex}} = 365$  nm) in the presence of **TNP** (0-120 eq) at various concentrations.

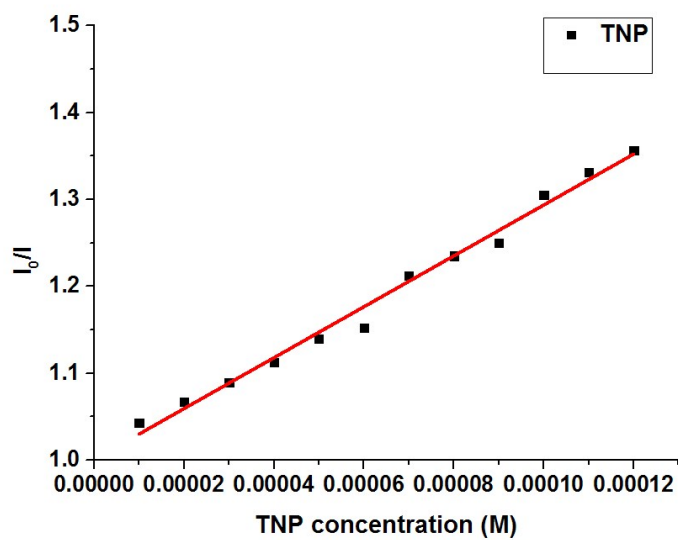

**Figure S15.** Stern–Volmer plot for quenching of **PHBC** with **TNP** in DCM.

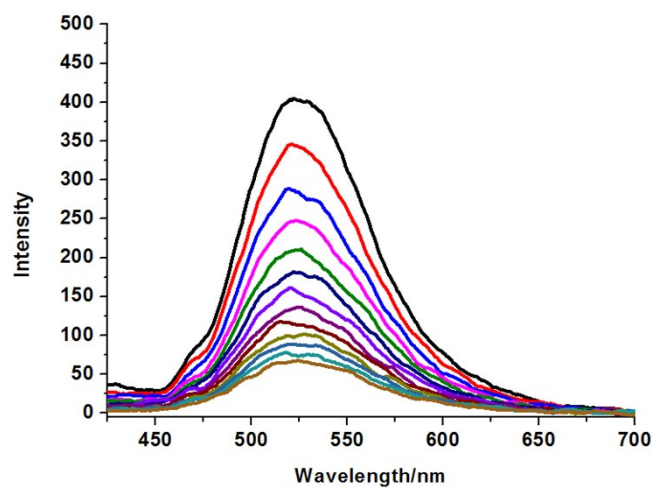

**Figure S16.** Emission spectra of **PHBC** ( $1.0 \times 10^{-6}$  M in  $\text{CH}_3\text{OH}$ ,  $\lambda_{\text{ex}}=365$  nm) with **TNP** (0-120 eq) at various concentrations.



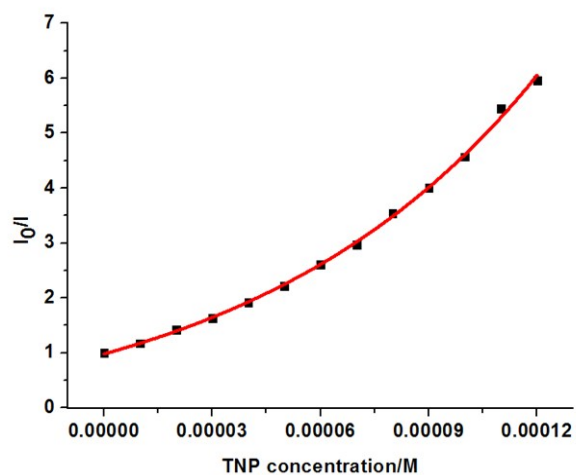

**Figure S17.** Stern–Volmer plot for quenching of **PHBC** with **TNP** in  $\text{CH}_3\text{OH}$ .

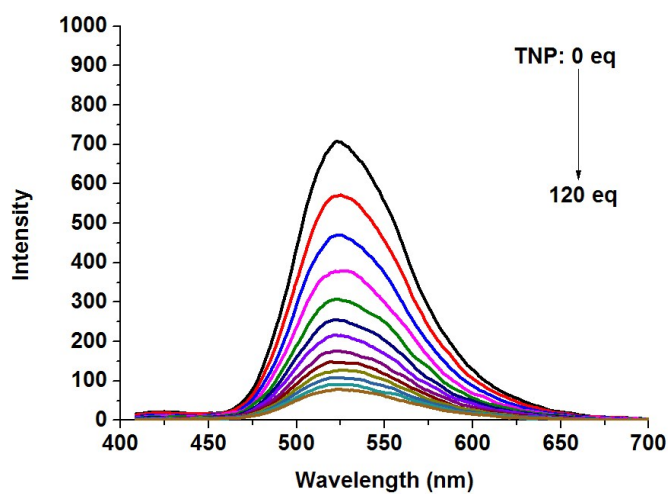

**Figure S18.** Emission spectra of **PHBC** ( $1.0 \times 10^{-6}$  M in  $\text{CH}_3\text{OH}/\text{H}_2\text{O}=6/4$ ,  $\lambda_{\text{ex}}=365$  nm) with **TNP** (0-120 eq) at various concentrations.

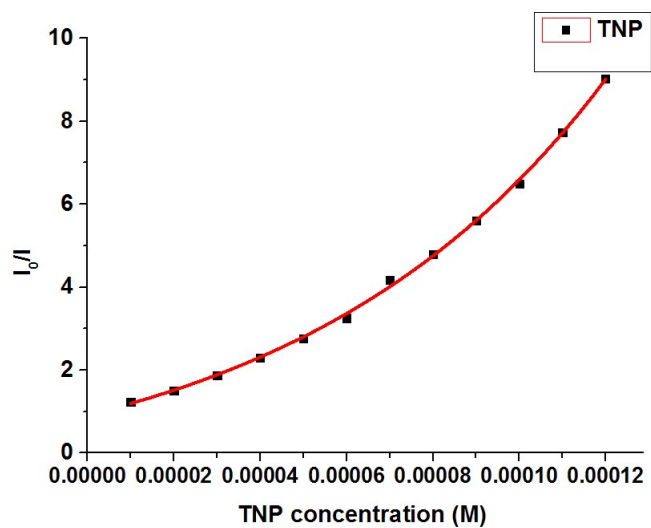

**Figure S19.** Stern–Volmer plot for quenching of **PHBC** with **TNP** in  $\text{CH}_3\text{OH}/\text{H}_2\text{O} = 6/4$ .

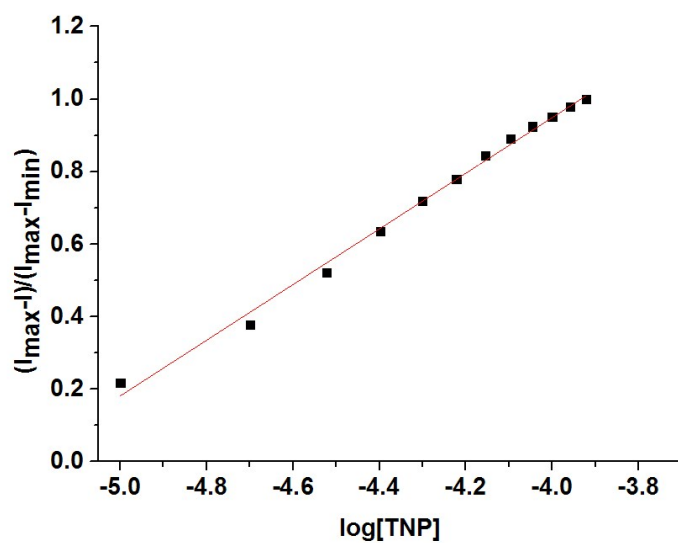

**Figure S20.**  $(I_{\max}-I)/(I_{\max}-I_{\min})$  vs  $\log[\text{TNP}]$  plots for **PHBC** in  $\text{CH}_3\text{OH}/\text{H}_2\text{O} = 6/4$ .

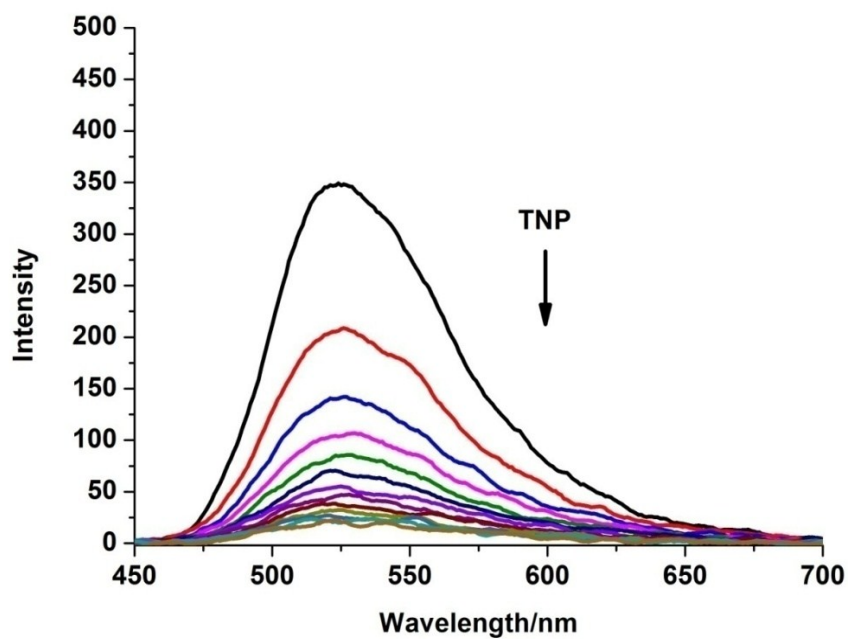

**Figure S21.** Emission spectra of **PHBC** ( $1.0 \times 10^{-6}$  M in  $\text{CH}_3\text{OH}/\text{H}_2\text{O}=1/9$ ,  $\lambda_{\text{ex}}=365$  nm) with **TNP** (0-120 eq) at various concentrations.

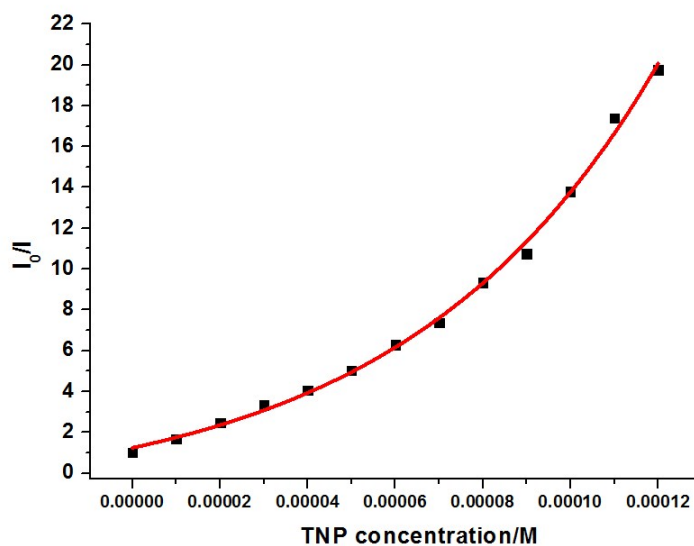

**Figure S22.** Stern–Volmer plot for quenching of **PHBC** with **TNP** in  $\text{CH}_3\text{OH}/\text{H}_2\text{O} =1/9$ .

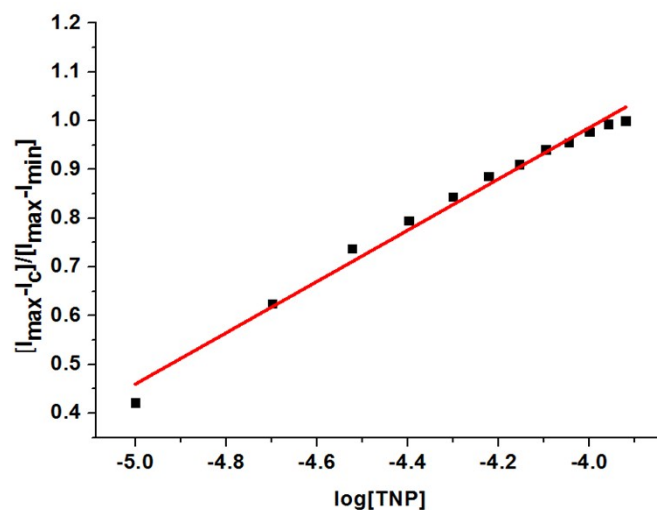

**Figure S23.**  $(I_{\max} - I)/(I_{\max} - I_{\min})$  vs  $\log[\text{TNP}]$  plots for **PHBC** in  $\text{CH}_3\text{OH}/\text{H}_2\text{O}=1/9$ .

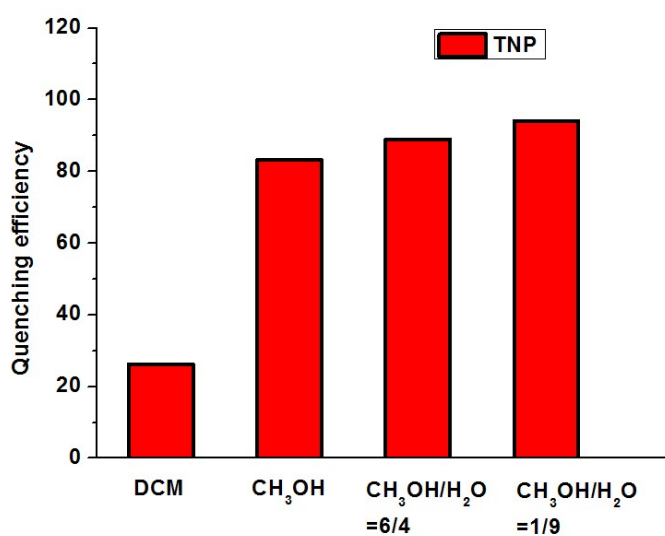

**Figure S24.** Quenching efficiency of **PHBC** ( $1.0 \times 10^{-6}$  M,  $\lambda_{\text{ex}}=365$  nm) with **TNP** (0-120 eq) at different solvents.

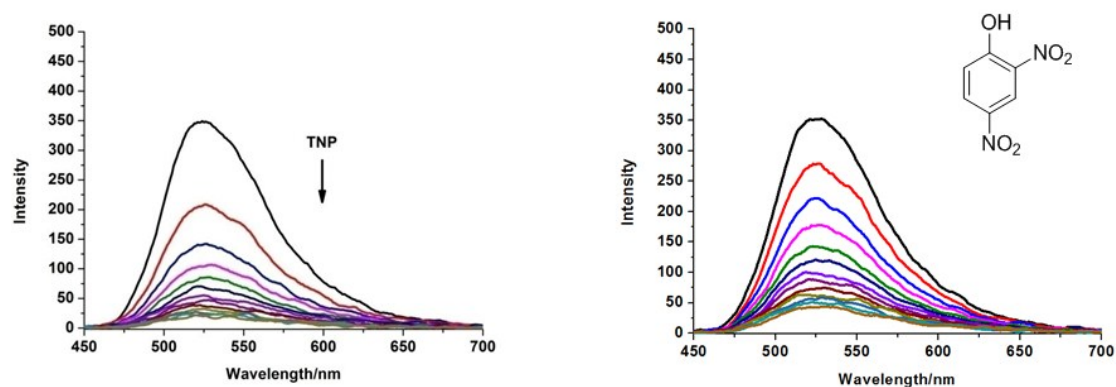

**Figure S25.** Emission spectra of **PHBC** ( $1.0 \times 10^{-6}$  M in  $\text{CH}_3\text{OH}/\text{H}_2\text{O}=1/9$ ,  $\lambda_{\text{ex}}=365$  nm) toward different analytes (0-120 eq) at various concentrations.

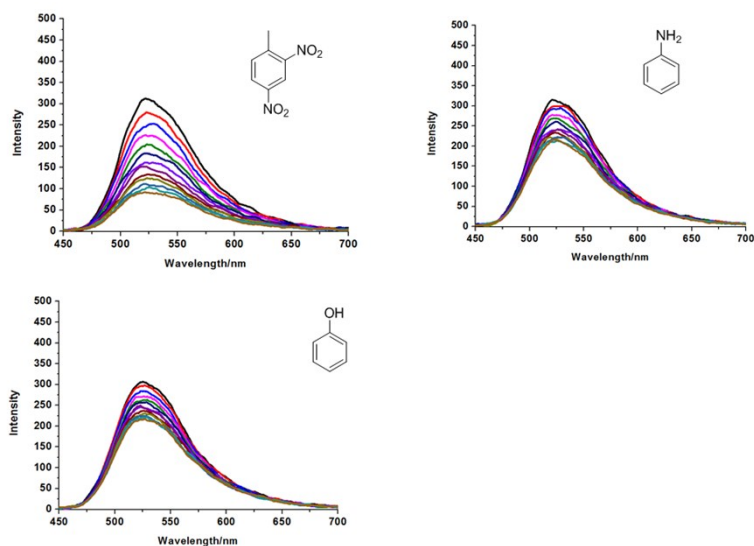

**Figure S26.** Emission spectra of **PHBC** ( $1.0 \times 10^{-6}$  M in  $\text{CH}_3\text{OH}/\text{H}_2\text{O}=1/9$ ,  $\lambda_{\text{ex}}=365$  nm) toward different analytes (0-120 eq) at various concentrations.

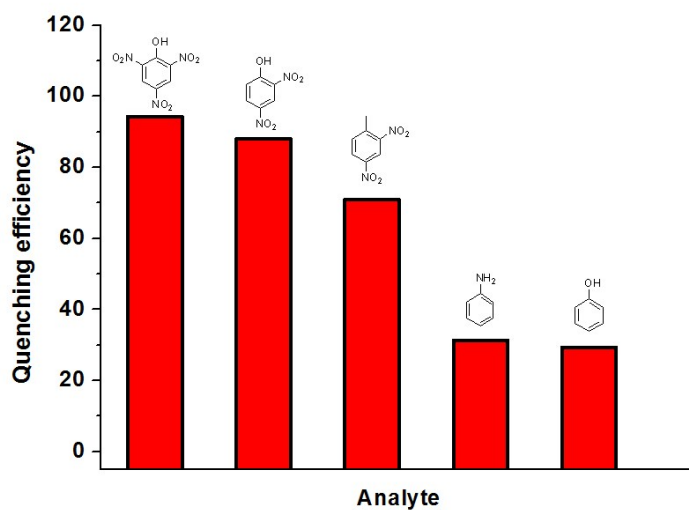

**Figure S27.** Quenching efficiency of **PHBC** ( $1.0 \times 10^{-6}$  M,  $\lambda_{\text{ex}}=365$  nm) toward different analytes (0-120 eq) in  $\text{CH}_3\text{OH}/\text{H}_2\text{O}=1/9$ .

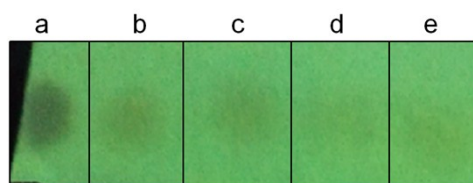

**Figure S28.** By applying a small spot of different concentrations of **TNP** ((a)  $1 \times 10^{-4}$  M, (b)  $1 \times 10^{-6}$  M, (c)  $1 \times 10^{-8}$  M, (d)  $1 \times 10^{-10}$  M, (e)  $1 \times 10^{-12}$  M) on test strips made from aggregates of **PHBC**.

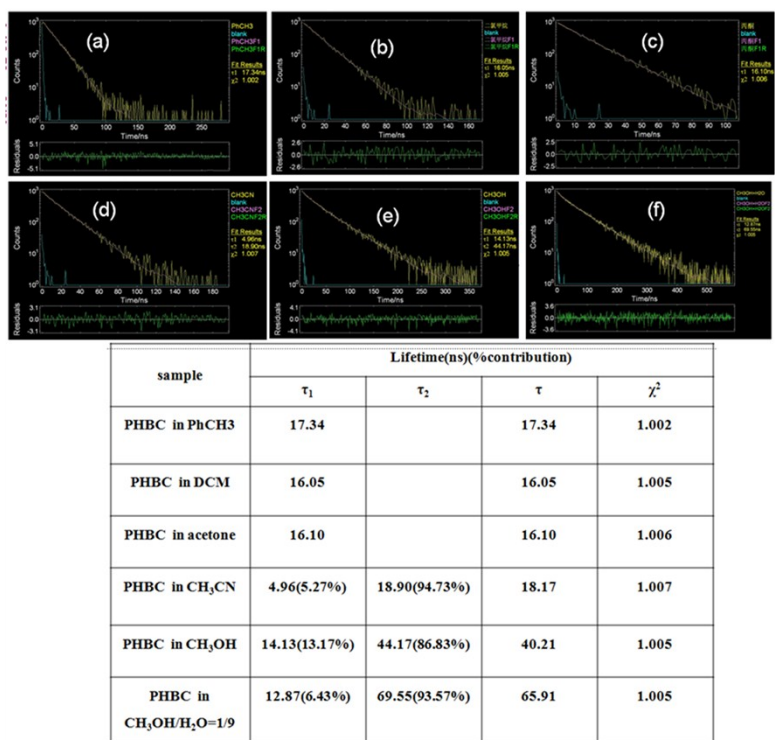

**Figure S29.** The fluorescence lifetime of **PHBC** (1.0×10<sup>-5</sup> M) in (a) PhCH<sub>3</sub>, (b) DCM, (c) acetone, (d) CH<sub>3</sub>CN, (e) CH<sub>3</sub>OH and (f) CH<sub>3</sub>OH/ H<sub>2</sub>O=1/9 ( $\lambda_{ex}$ = 365 nm).

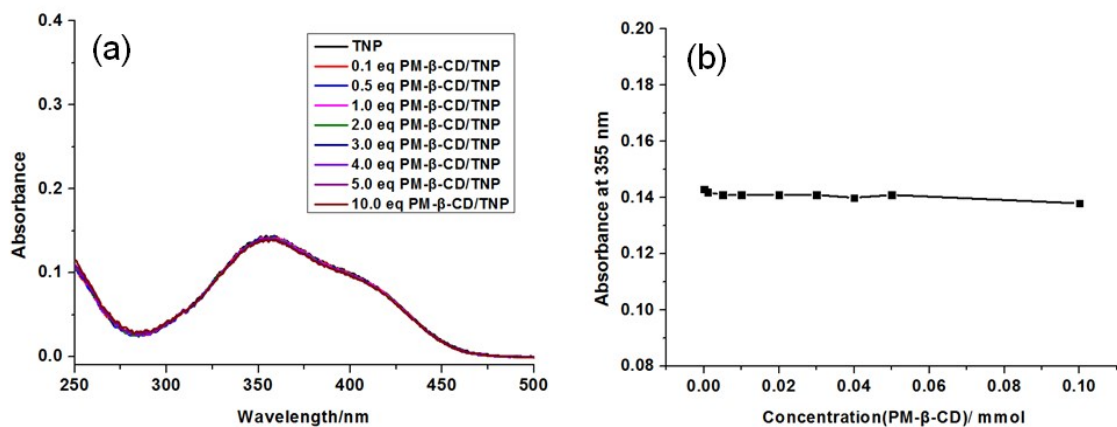

**Figure S30.** (a) UV-vis spectra of **TNP** (1.0×10<sup>-5</sup> M) with the gradual addition of **PM-β-CD**. (b) Absorbance change of **TNP** with the gradual addition of **PM-β-CD** at 355 nm.

## References:

1. C. M. Vanos and T. H. Lambert, *Angew. Chem., Int. Ed.*, 2011, **50**, 12222-12226.
2. J. Li, B. Hu, G. Hu, X. Li, P. Lu and Y. Wang, *Org. Biomol. Chem.*, 2012, **10**, 8848-8859.
3. J. S. Wu, M. D. Watson, N. Tchebotareva, Z. H. Wang and K. Müllen, *J. Org. Chem.*, 2004, **69**, 8194-8204.
4. J. P. Hill, W. S. Jin, A. Kosaka, T. Fukushima, H. Ichihara, T. Shimomura, K. Ito, T. Hashizume, N. Ishii and T. Aida, *Science*, 2004, **304**, 1481-1483.
